# Supplementary material
Source: PubMed Central journal article supplement (PMC3505018)
Supplement: ismej201267x1.pdf [file ismej201267x1.pdf]

# Supplementary Figure 1: Seasonal growth cycle of *Laminaria hyperborea* and kelp thallus regions sampled (succession experiment)

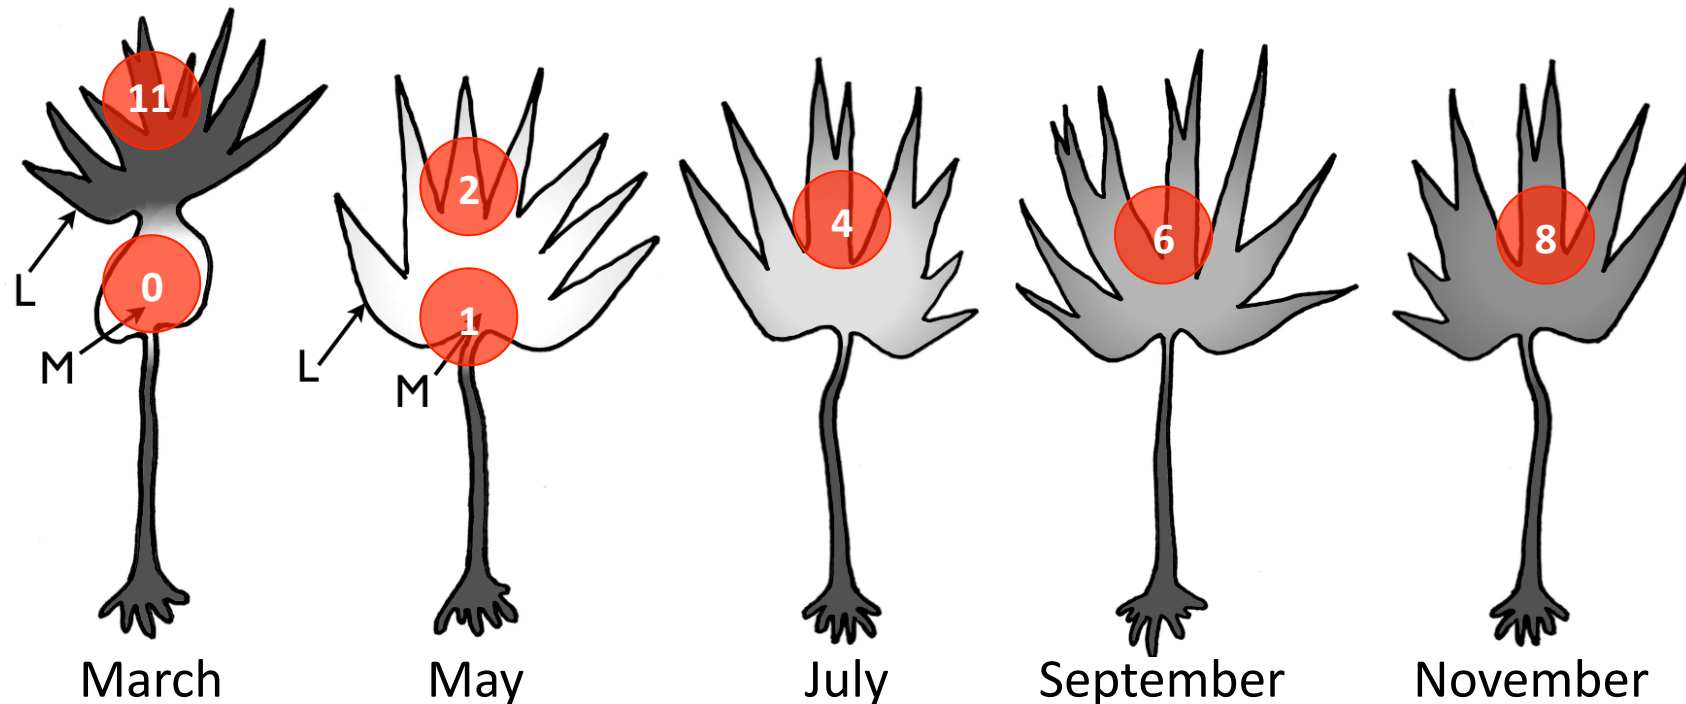

**1 = region sampled and approximate surface age in months**

M = meristem region    L = distal lamina region

Shading according to surface age: dark=older, light=younger
