# Supplementary material
Source: PubMed Central journal article supplement (PMC3505018)
Supplement: ismej201267x2.pdf [file ismej201267x2.pdf]

## Supplementary Figure 2: Sampling sites

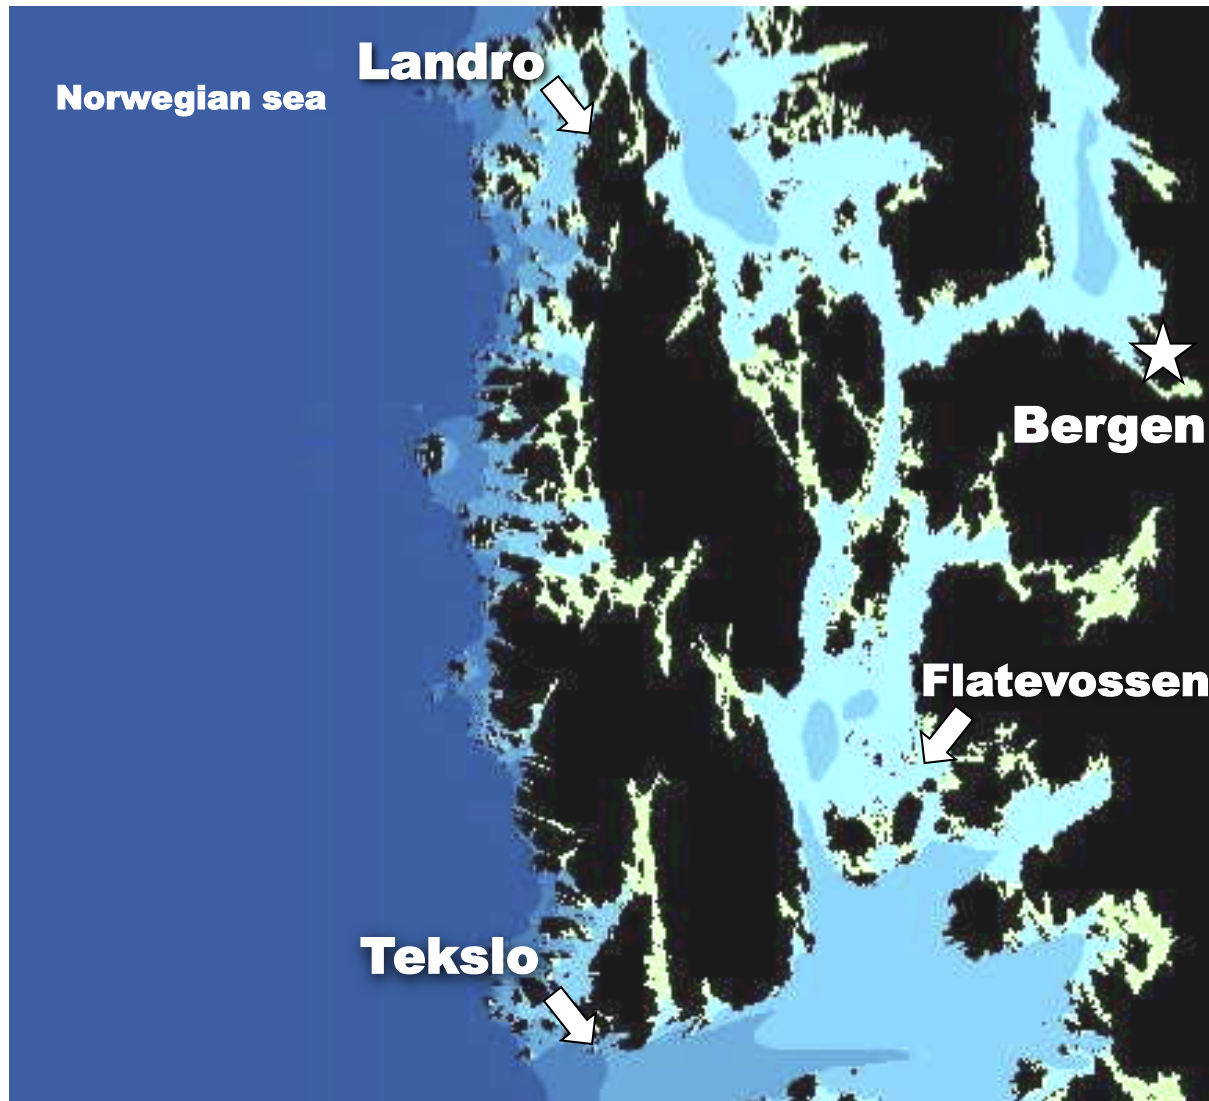

Wave exposure:

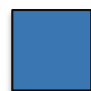

Exposed

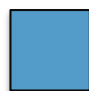

Moderately exposed

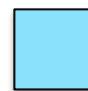

Sheltered

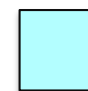

Extremely sheltered
