# Supplementary material
Source: PubMed Central journal article supplement (PMC3505018)
Supplement: ismej201267x5.pdf [file ismej201267x5.pdf]

# Supplementary Figure 5

**a.**

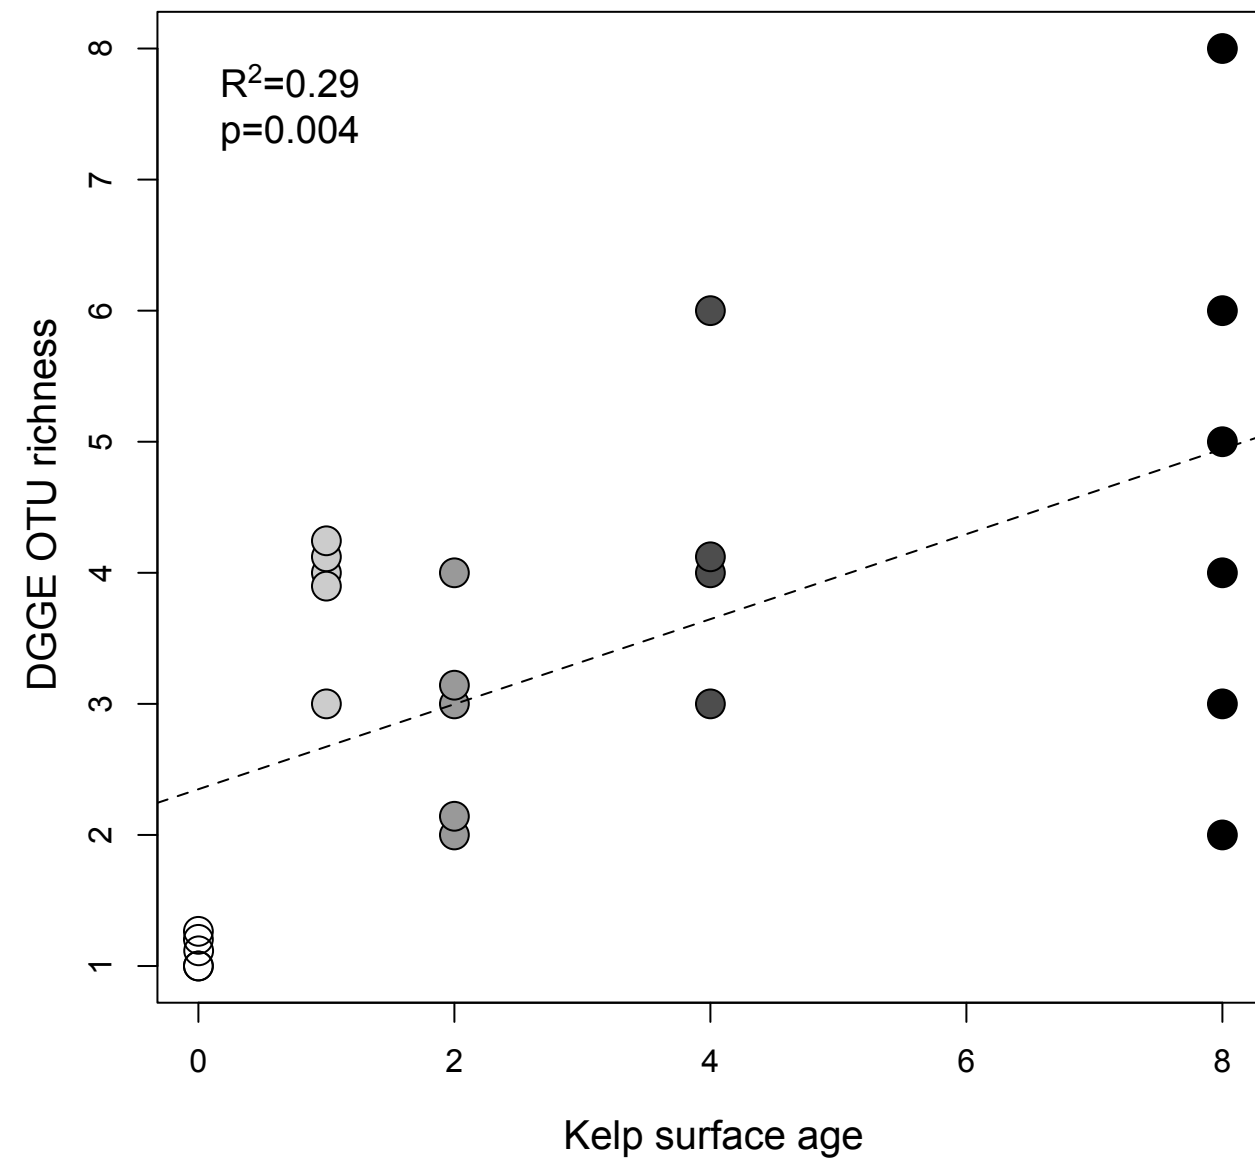

**b.**

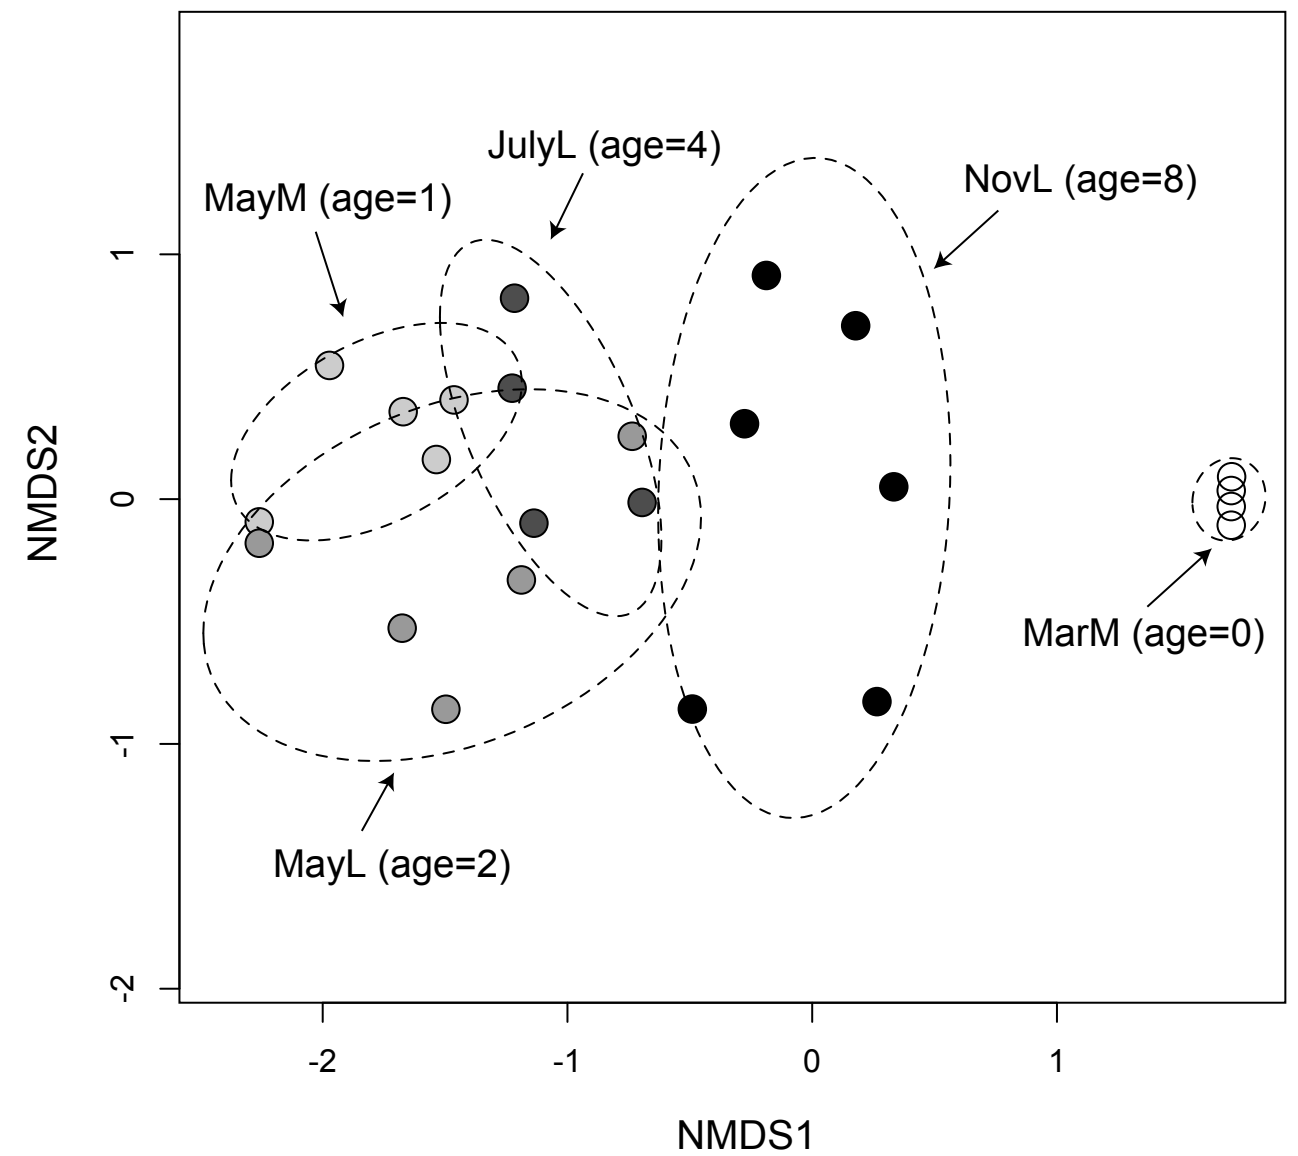

**Supplementary Figure 5:** An analysis of replicated samples from the succession experiment using DGGE to compare OTU richness with kelp surface age (a), and visualize successional changes in community composition (b). The apparent increase in OTU richness over time (a) is consistent with the pyrosequencing data (Fig. 2b). The community composition shows a similar pattern as observed with pyrosequencing (Fig. 3b), in that samples are grouped along a kelp surface age gradient in the nMDS ordination, except MarM which is dissimilar to the other samples. The nMDS analysis is based on presence/absence data using the Jaccard dissimilarity metric. The ellipses have been drawn to facilitate interpretation and represent 80% confidence areas. Some points have been offset slightly on the y-axes to display overlapping points (both a and b).
