# Supplementary material
Source: PubMed Central journal article supplement (PMC3505018)
Supplement: ismej201267x6.pdf [file ismej201267x6.pdf]

| Sample id | Season    | Site        | Year | Kelp thallus region | Surface age (months) | Area sampled (cm <sup>2</sup> ) | Cell density (cells/cm <sup>2</sup> ) | Bacterial production (DPM/cm <sup>2</sup> ) | Cell division time (days) |
|-----------|-----------|-------------|------|---------------------|----------------------|---------------------------------|---------------------------------------|---------------------------------------------|---------------------------|
| MarM      | March     | Tekslo      | 2007 | Meristem            | 0                    | 300                             | 1.25e4                                | -                                           | -                         |
| MayM      | May       | Tekslo      | 2007 | Meristem            | 1                    | 300                             | 3.27e6                                | -                                           | -                         |
| MayL      | May       | Tekslo      | 2007 | Lamina              | 2                    | 300                             | 2.73e6                                | -                                           | -                         |
| JulyL     | July      | Tekslo      | 2007 | Lamina              | 4                    | 300                             | 8.76e6                                | -                                           | -                         |
| SepL      | September | Tekslo      | 2007 | Lamina              | 6                    | 300                             | 2.43e6                                | -                                           | -                         |
| NovL      | November  | Tekslo      | 2007 | Lamina              | 8                    | 300                             | 1.20e7                                | -                                           | -                         |
| MarL      | March     | Tekslo      | 2007 | Lamina              | 11                   | 300                             | 4.33e6                                | -                                           | -                         |
| T1        | July      | Tekslo      | 2009 | Lamina              | 4                    | 6                               | 1.06e6                                | 349.3                                       | 11.29                     |
| T2        | July      | Tekslo      | 2009 | Lamina              | 4                    | 6                               | 4.0e6                                 | 872.4                                       | 17.00                     |
| T3        | July      | Tekslo      | 2009 | Lamina              | 4                    | 6                               | 3.37e6                                | 276.8                                       | 45.03                     |
| T4        | July      | Tekslo      | 2009 | Lamina              | 4                    | 6                               | 5.49e6                                | 2838.7                                      | 7.17                      |
| F1        | July      | Flatevossen | 2009 | Lamina              | 4                    | 6                               | 1.00e7                                | 7398.3                                      | 5.03                      |
| F2        | July      | Flatevossen | 2009 | Lamina              | 4                    | 6                               | 1.52e7                                | 3303.8                                      | 17.06                     |
| F3        | July      | Flatevossen | 2009 | Lamina              | 4                    | 6                               | 1.25e7                                | 2955.9                                      | 15.67                     |
| F4        | July      | Flatevossen | 2009 | Lamina              | 4                    | 6                               | 1.40e7                                | 594.0                                       | 87.58                     |
| F5        | July      | Flatevossen | 2009 | Lamina              | 4                    | 6                               | 1.19e7                                | 232.5                                       | 189.64                    |
| F6        | July      | Flatevossen | 2009 | Lamina              | 4                    | 6                               | 1.36e7                                | 478.0                                       | 105.4                     |
| L1        | July      | Landro      | 2009 | Lamina              | 4                    | 6                               | 7.51e6                                | 519.7                                       | 53.54                     |
| L2        | July      | Landro      | 2009 | Lamina              | 4                    | 6                               | 8.73e6                                | 179.2                                       | 180.43                    |
| L3        | July      | Landro      | 2009 | Lamina              | 4                    | 6                               | 7.12e6                                | 225.0                                       | 117.19                    |
| L4        | July      | Landro      | 2009 | Lamina              | 4                    | 6                               | 9.05e6                                | 13.1                                        | 2568.2                    |
| L5        | July      | Landro      | 2009 | Lamina              | 4                    | 6                               | 5.31e6                                | 8.4                                         | 2341.35                   |
| L6        | July      | Landro      | 2009 | Lamina              | 4                    | 6                               | 7.64e6                                | 7.8                                         | 3621.22                   |

| Sample id | Sequence reads | Observed 97% OTUs | Chao1 97% OTU richness | Rarefied 97% OTU richness | Parametric 97% OTU richness | Sequencing depth required for detecting 90% of OTUs | Evenness (Pielou index) |
|-----------|----------------|-------------------|------------------------|---------------------------|-----------------------------|-----------------------------------------------------|-------------------------|
| MarM      | 8195           | 133               | 166                    | 132                       | 210                         | 99600                                               | 0.22                    |
| MayM      | 14634          | 152               | 251                    | 118                       | 614                         | 1200000                                             | 0.53                    |
| MayL      | 9434           | 160               | 250                    | 149                       | 380                         | 290000                                              | 0.57                    |
| JulyL     | 9969           | 204               | 324                    | 186                       | 462                         | 234000                                              | 0.58                    |
| SepL      | 10288          | 179               | 251                    | 163                       | 277                         | 96300                                               | 0.53                    |
| NovL      | 7952           | 242               | 369                    | 242                       | 444                         | 125000                                              | 0.61                    |
| MarL      | 10024          | 284               | 427                    | 258                       | 467                         | 96300                                               | 0.62                    |
| T1        | 1379           | 65                | 82                     | 65                        | 75                          | 14100                                               | 0.62                    |
| T2        | 4354           | 92                | 105                    | 90                        | 99                          | 15100                                               | 0.62                    |
| T3        | 3909           | 102               | 126                    | 102                       | 95                          | 9470                                                | 0.61                    |
| T4        | 7190           | 90                | 107                    | 77                        | 106                         | 23500                                               | 0.61                    |
| F1        | 10453          | 166               | 217                    | 125                       | 175                         | 26300                                               | 0.70                    |
| F2        | 8024           | 146               | 251                    | 108                       | 285                         | 138000                                              | 0.53                    |
| F3        | 12354          | 137               | 235                    | 94                        | 199                         | 101000                                              | 0.62                    |
| F4        | 12316          | 128               | 185                    | 87                        | 150                         | 55500                                               | 0.55                    |
| F5        | 15636          | 264               | 305                    | 175                       | 285                         | 35000                                               | 0.68                    |
| F6        | 17435          | 144               | 191                    | 83                        | 206                         | 121000                                              | 0.53                    |
| L1        | 4917           | 179               | 238                    | 167                       | 218                         | 53200                                               | 0.55                    |
| L2        | 9791           | 65                | 128                    | 45                        | 224                         | 671000                                              | 0.31                    |
| L3        | 11242          | 140               | 183                    | 96                        | 211                         | 109000                                              | 0.47                    |
| L4        | 10748          | 117               | 131                    | 84                        | 174                         | 84800                                               | 0.45                    |
| L5        | 15658          | 76                | 86                     | 50                        | 95                          | 68700                                               | 0.35                    |
| L6        | 12615          | 48                | 83                     | 33                        | 85                          | 160000                                              | 0.34                    |
