# Supplementary material
Source: PubMed Central journal article supplement (PMC3505018)

# Supplementary Figure 3

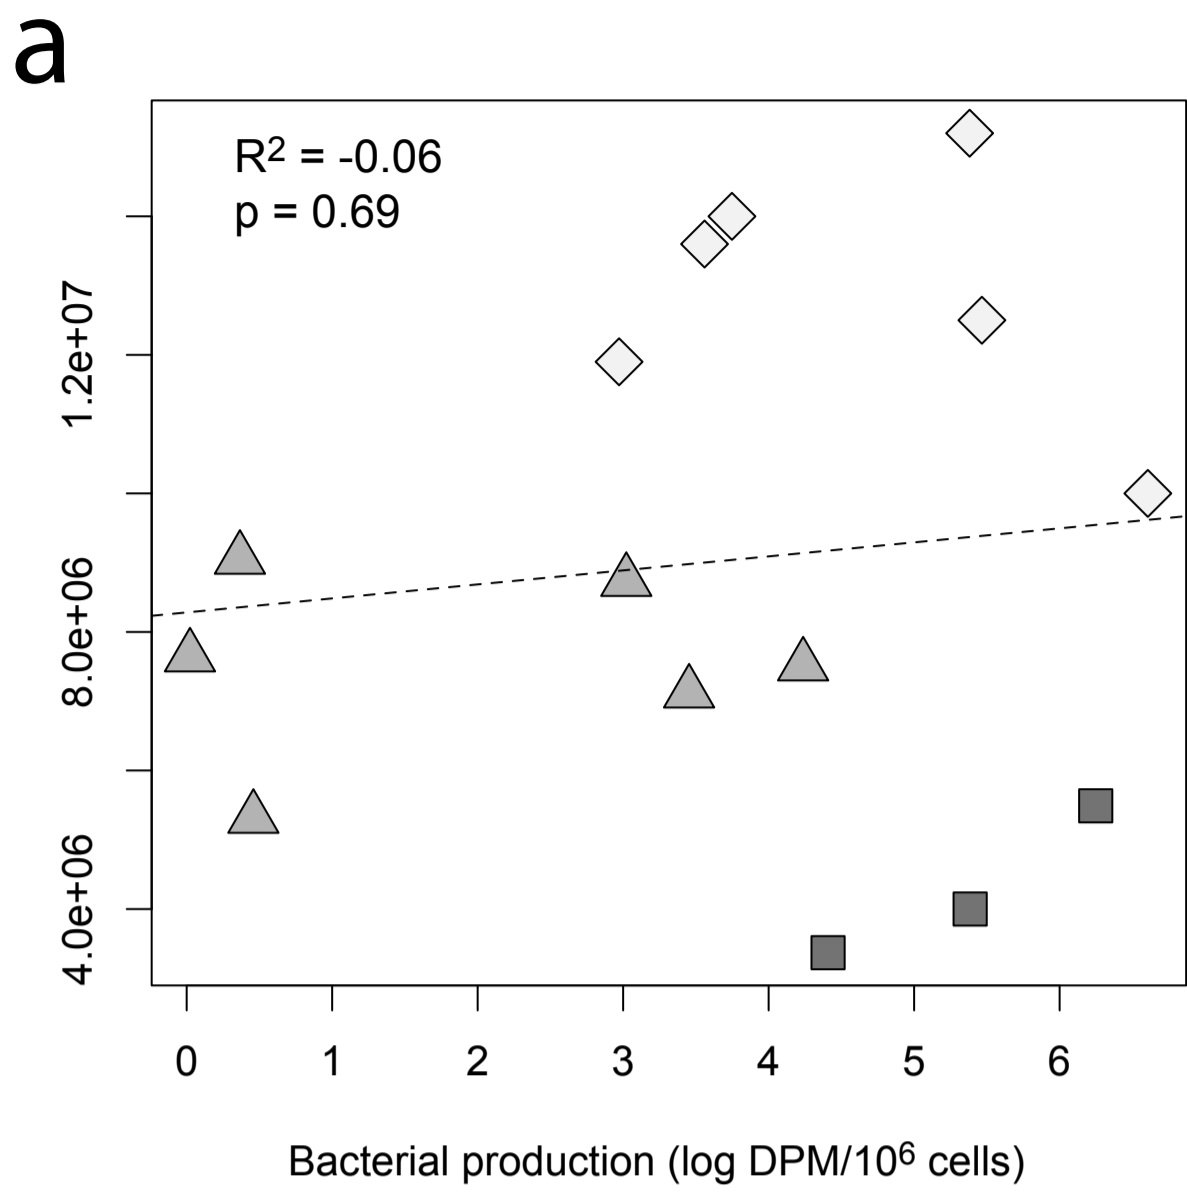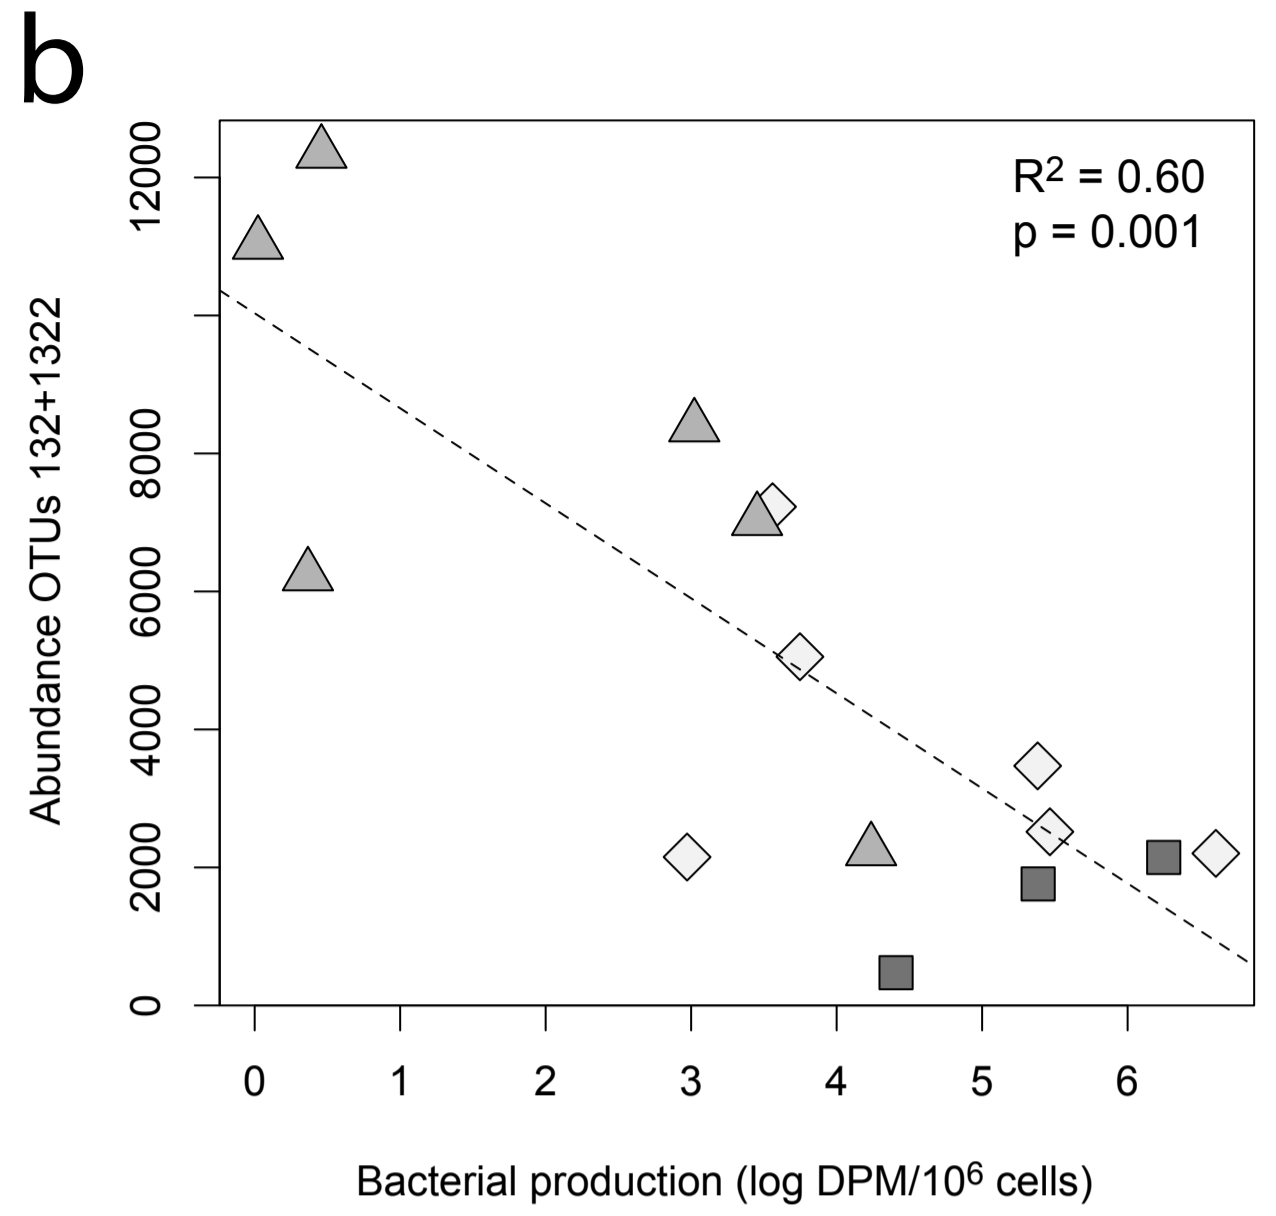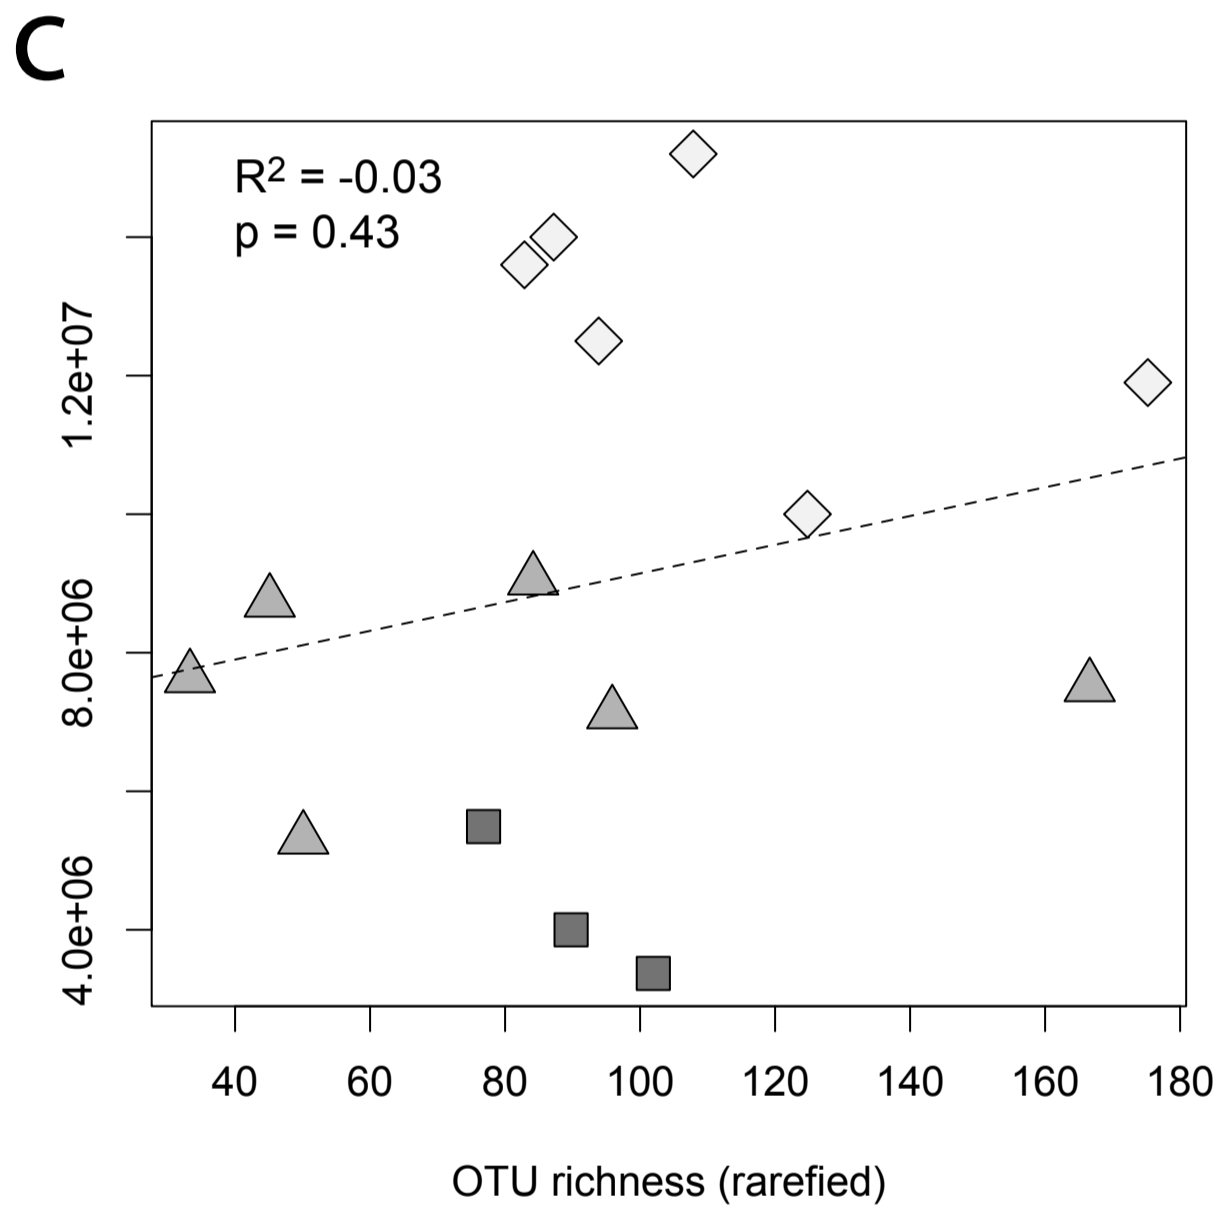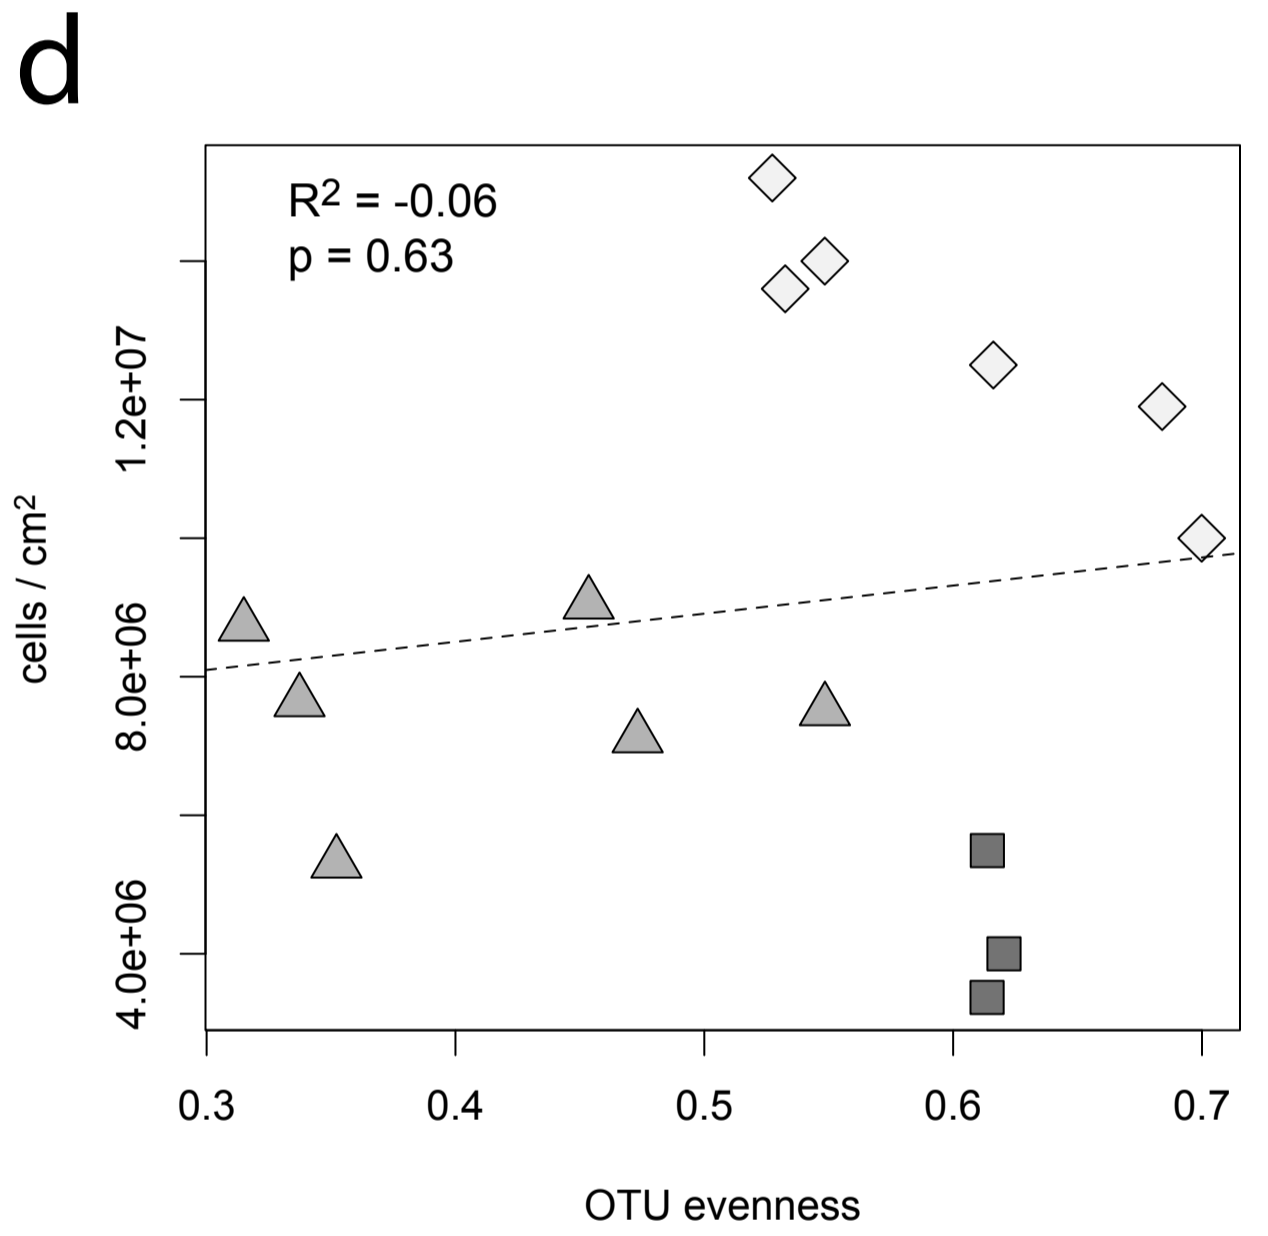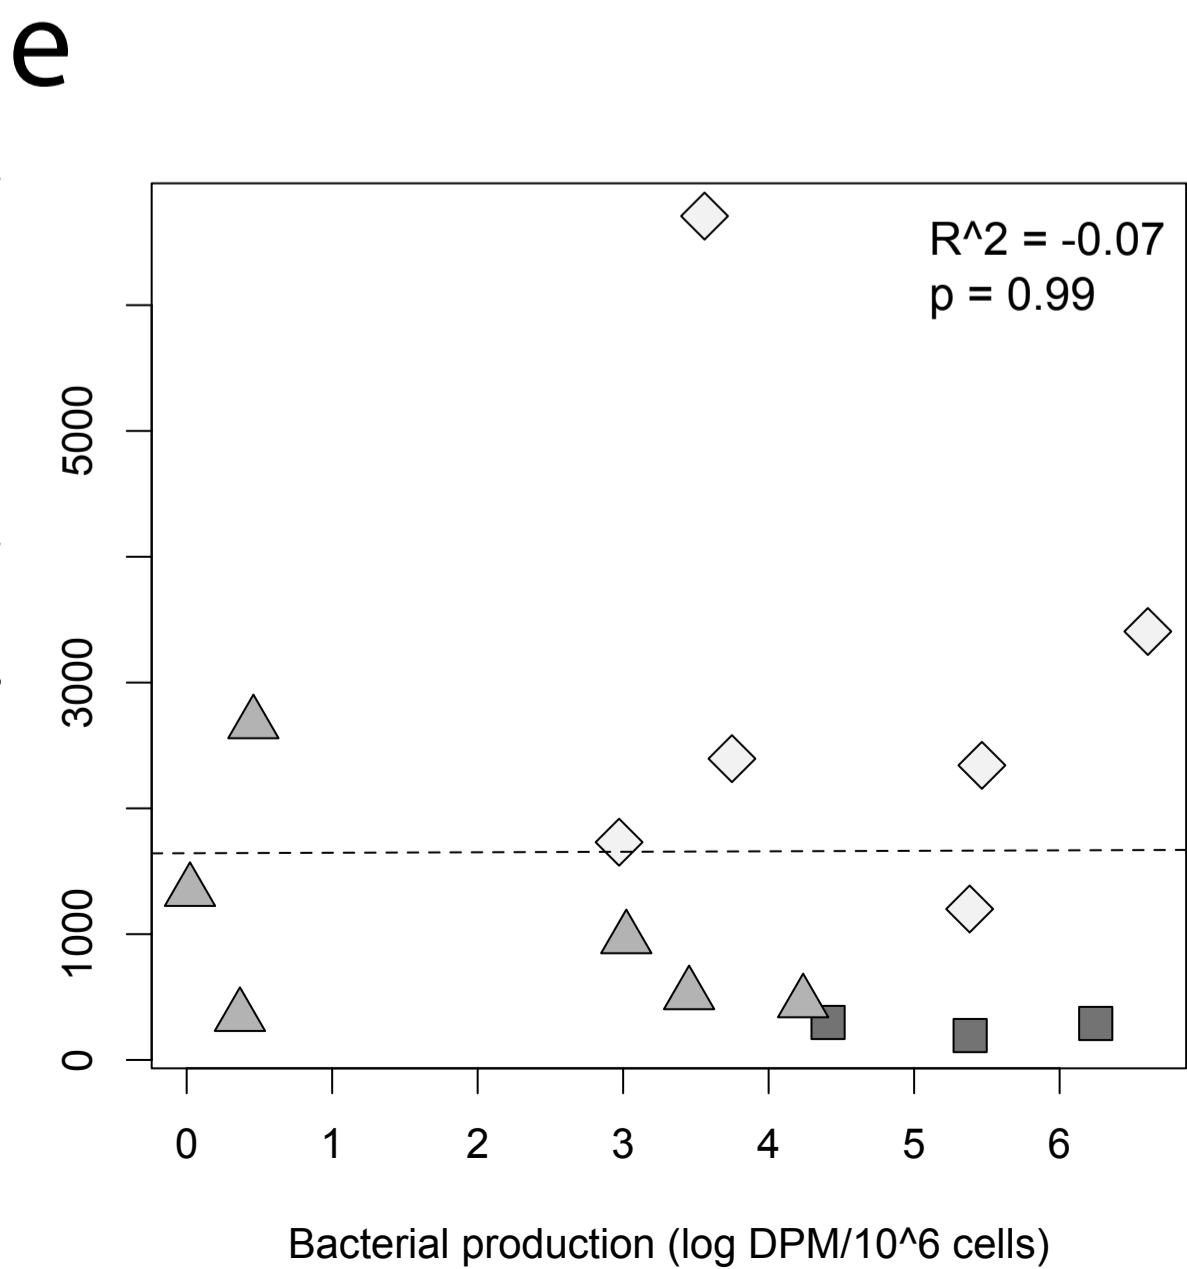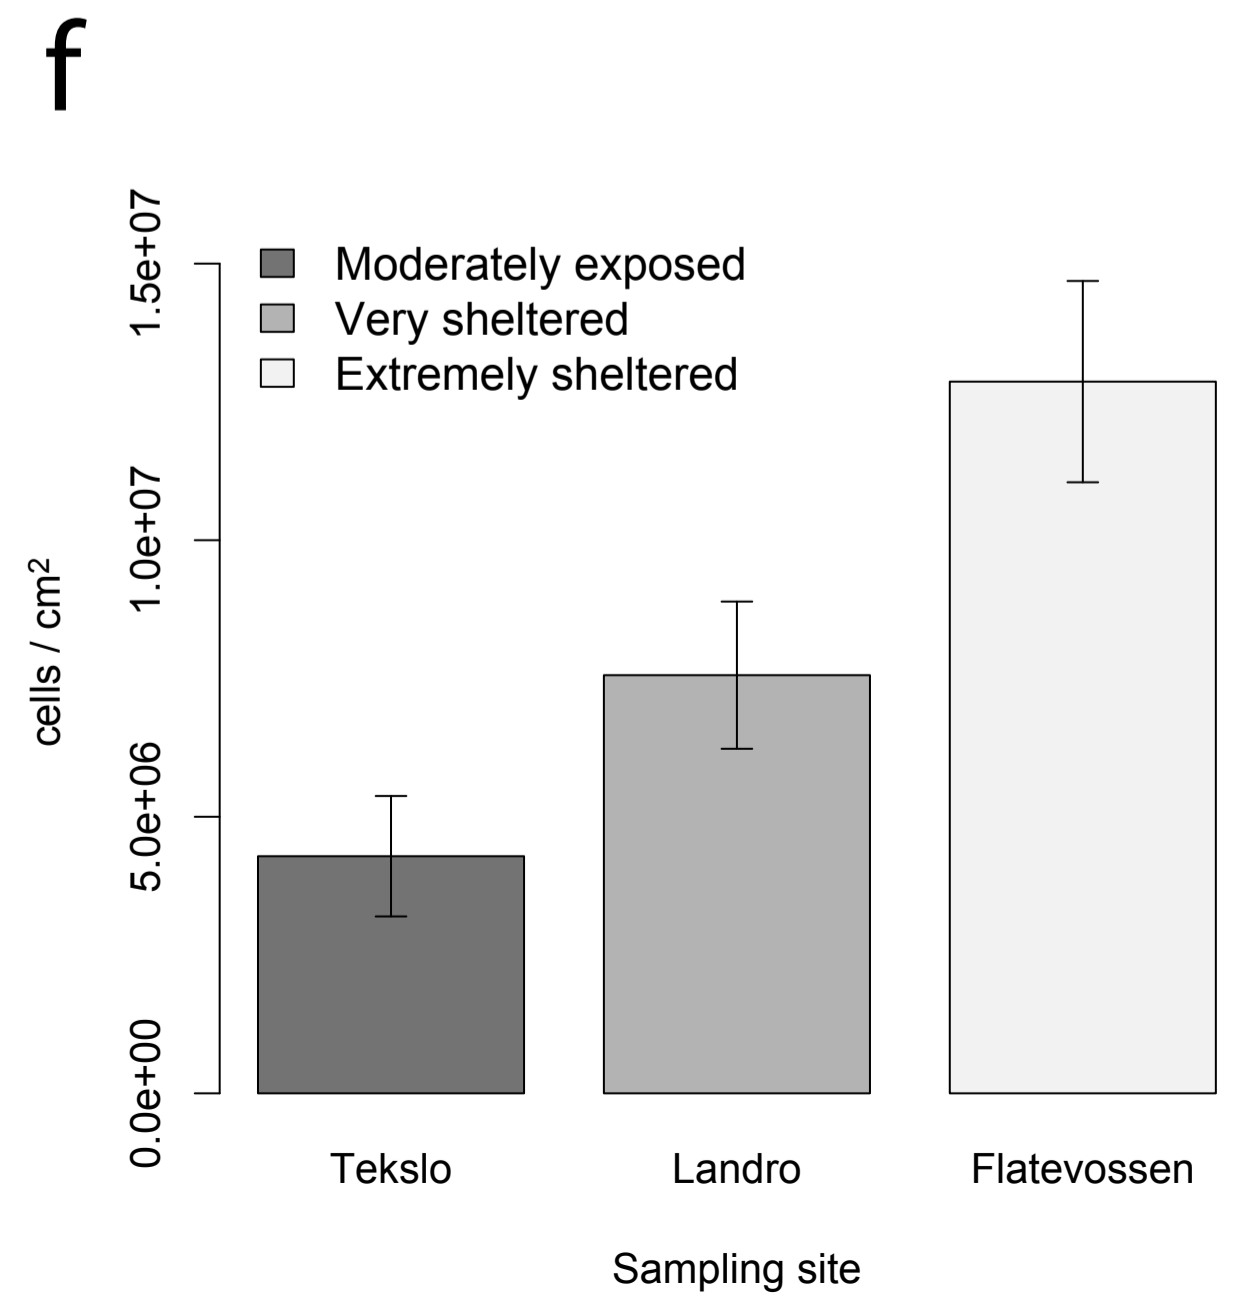

Supplement: ismej201267x3.pdf [file ismej201267x3.pdf]

# Supplementary Figure 4

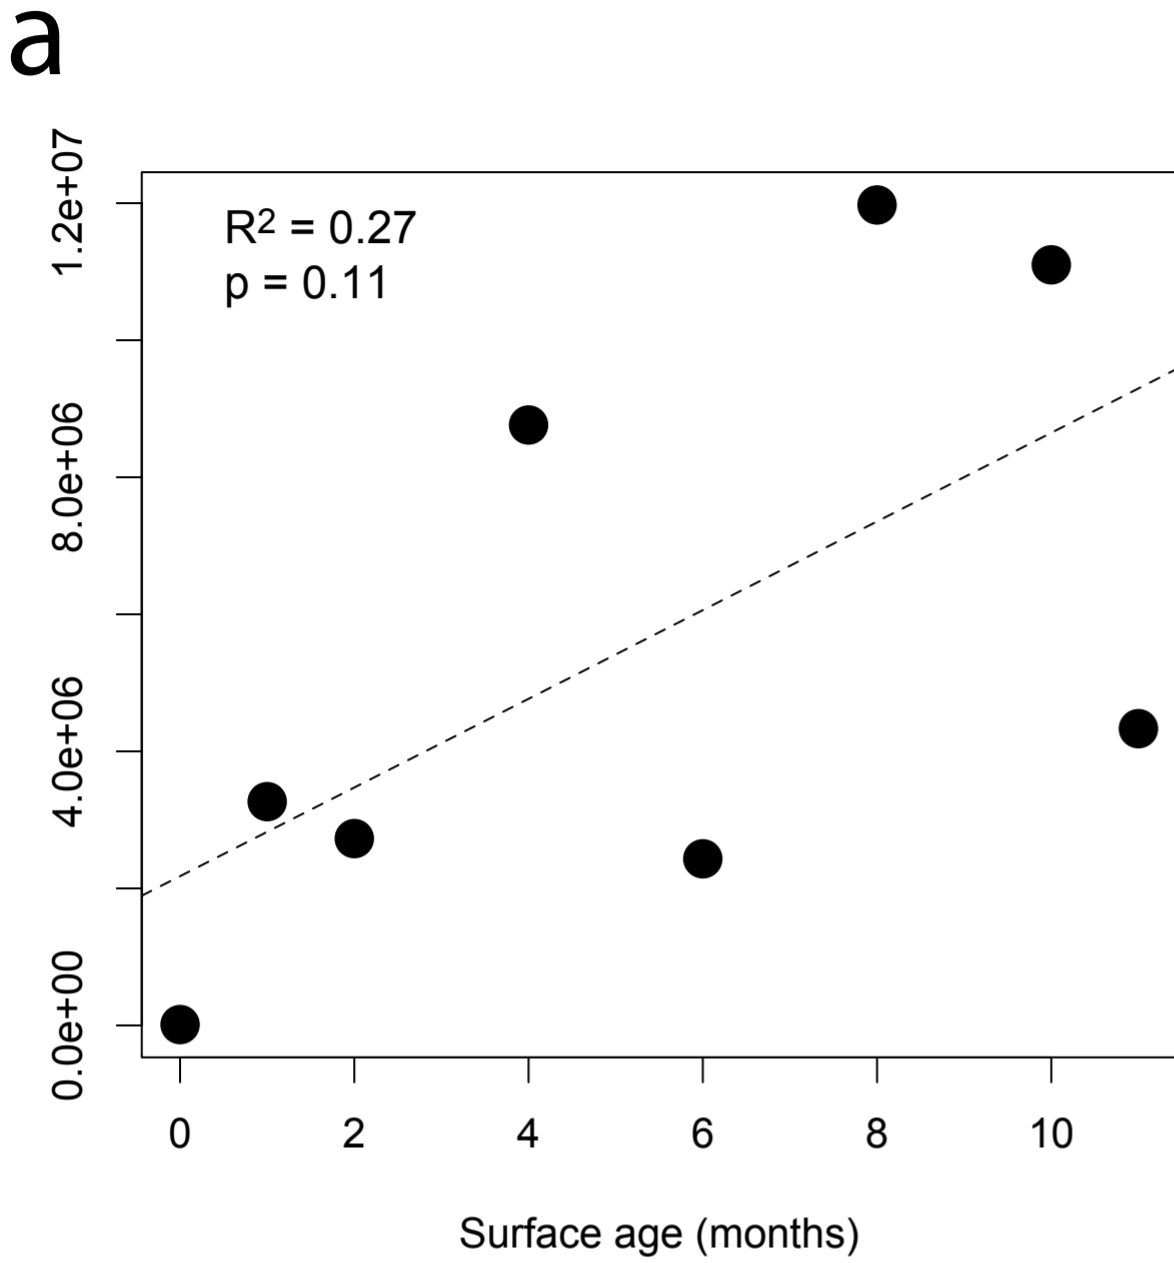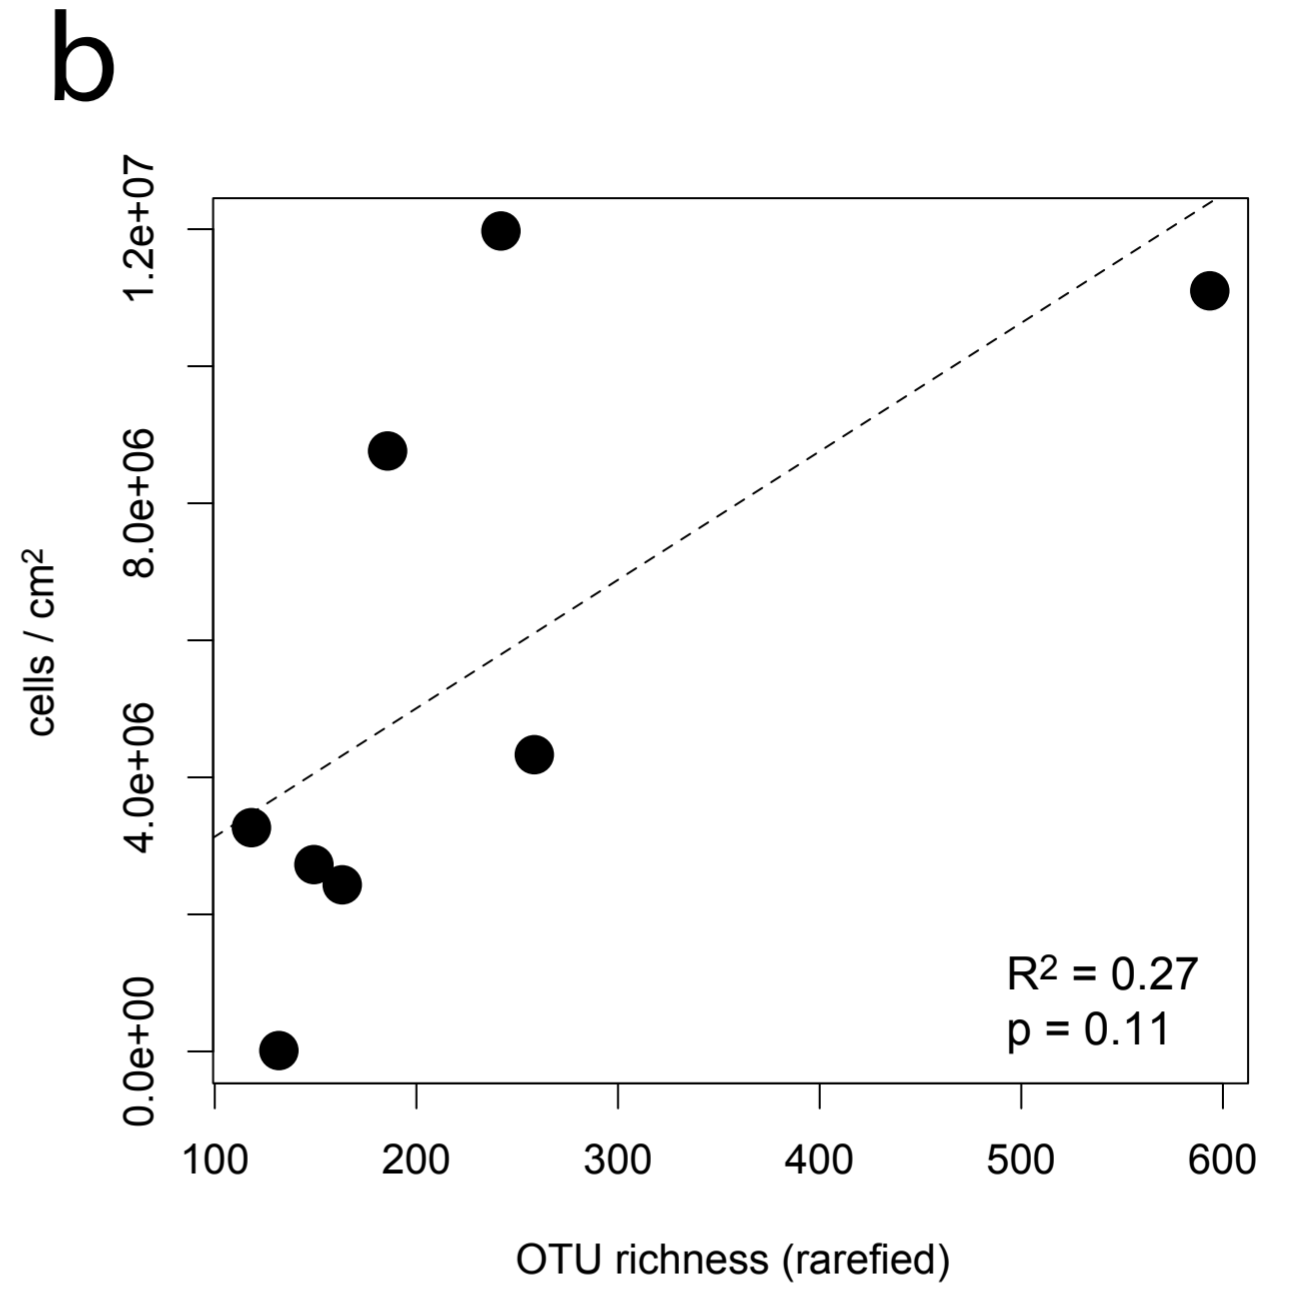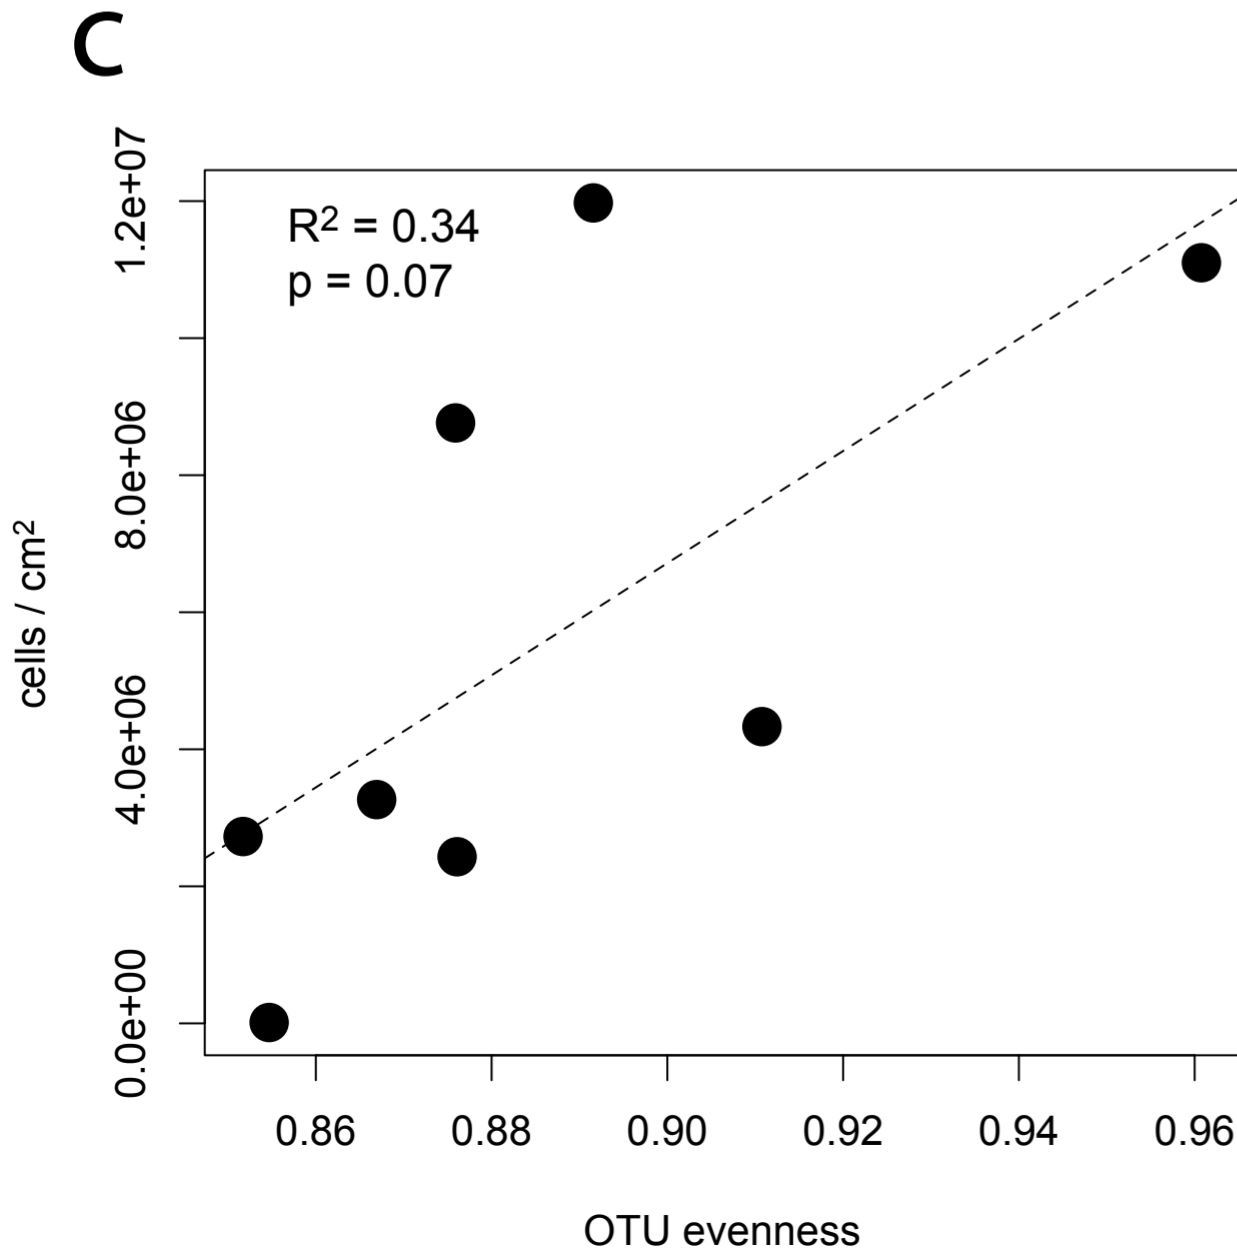

Supplement: ismej201267x4.pdf [file ismej201267x4.pdf]
